# Supplementary material for: Design, CTAB-catalyzed ultrasound-assisted synthesis and tyrosinase inhibition potential of naphthofuran-triazole conjugates
Source: Royal Society of Chemistry journal article supplement (doi:10.1039/d4ra05649c), 2024-01-01
Supplement: d4ra05649c1.pdf [file d4ra05649c1.pdf]

## **Design, CTAB Catalyzed Ultrasound Assisted Synthesis and Tyrosinase Inhibition Potential of Naphthofuran -Triazole Conjugates**

Aqsa Mushtaq<sup>1</sup>, Mirza Nadeem Ahmad<sup>2,\*</sup>, Ameer Fawad Zahoor<sup>1,\*\*</sup>, Shagufta Kamal<sup>3</sup>, Kulsoom Ghulam Ali<sup>1</sup>, Jamila Javid<sup>4</sup>, Bushra Parveen<sup>1</sup>, Usman Nazeer<sup>5</sup>, Mashooq Ahmad Bhat<sup>6, \*\*\*</sup>

<sup>1</sup>Department of Chemistry, Government College University Faisalabad, Faisalabad-38000, Pakistan.

<sup>2</sup>Department of Applied Chemistry, Government College University Faisalabad, Faisalabad-38000, Pakistan.

<sup>3</sup>Department of Biochemistry, Government College University Faisalabad, Faisalabad 38000, Pakistan.

<sup>4</sup> Department of Chemistry, University of Sialkot, Sialkot, Pakistan.

<sup>5</sup> Department of Chemistry, University of Houston, 3585 Cullen Boulevard, Texas 77204-5003, USA.

<sup>6</sup> Department of Pharmaceutical Chemistry, College of Pharmacy, King Saud University, Riyadh 11451, Saudi Arabia.

\*Correspondence: [pioneeravian@hotmail.com](mailto:pioneeravian@hotmail.com); [fawad.zahoor@gcuf.edu.pk](mailto:fawad.zahoor@gcuf.edu.pk); [mabhat@ksu.edu.sa](mailto:mabhat@ksu.edu.sa)

### **Contents**

- 1. NMR spectra**
  - A) <sup>1</sup>H-NMR spectra**
  - B) <sup>13</sup>C-NMR spectra**
- 2. MS Spectra**

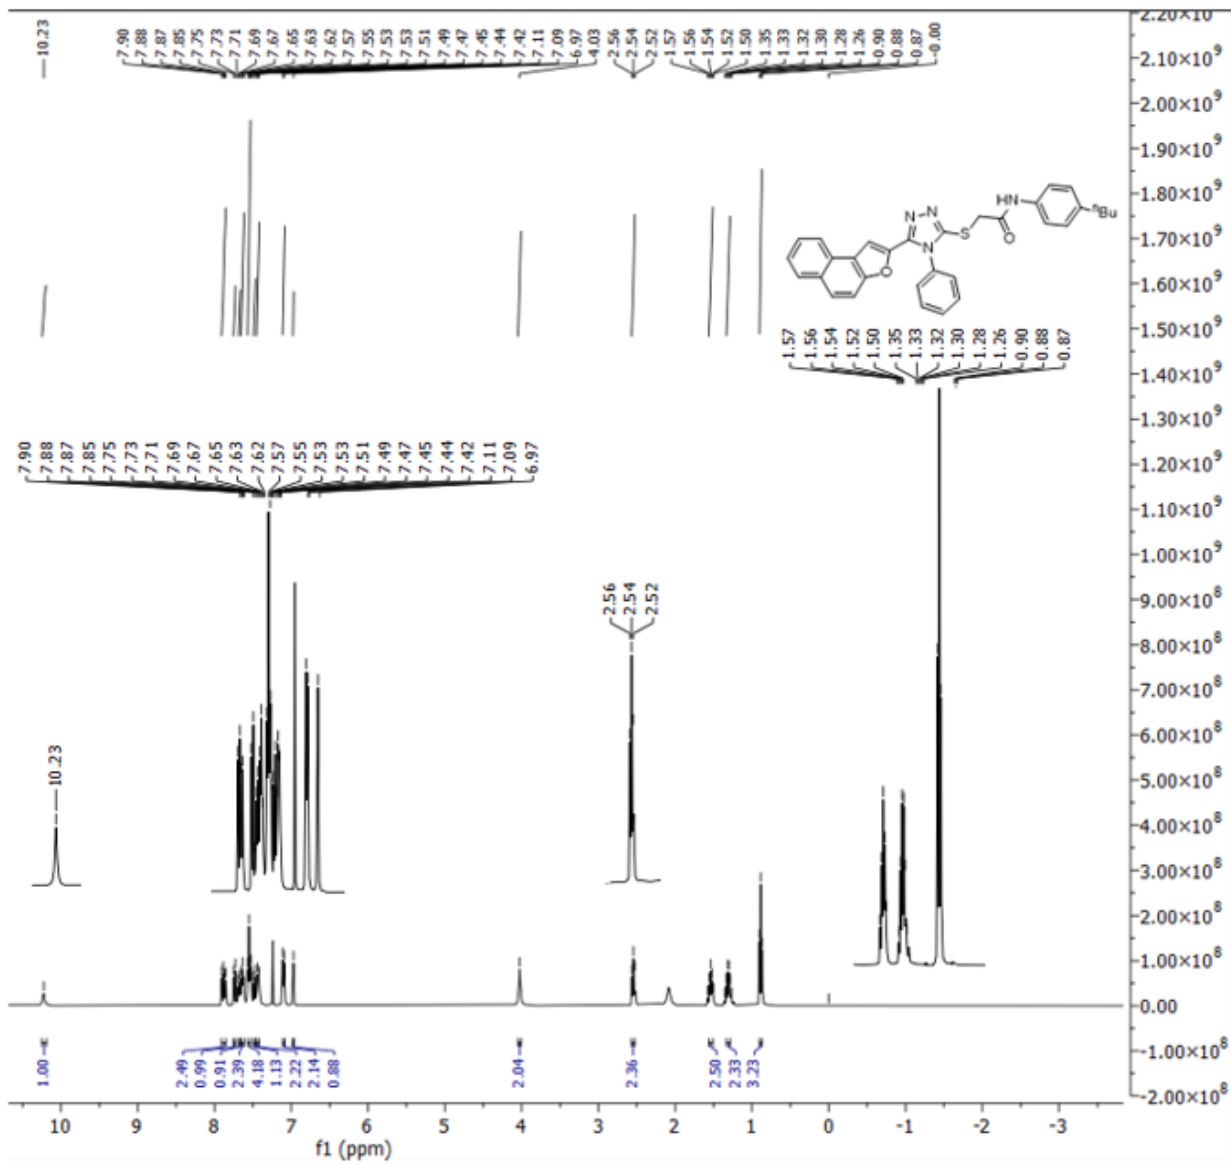

Figure S 1.1: <sup>1</sup>H-NMR Spectra of compound 20a

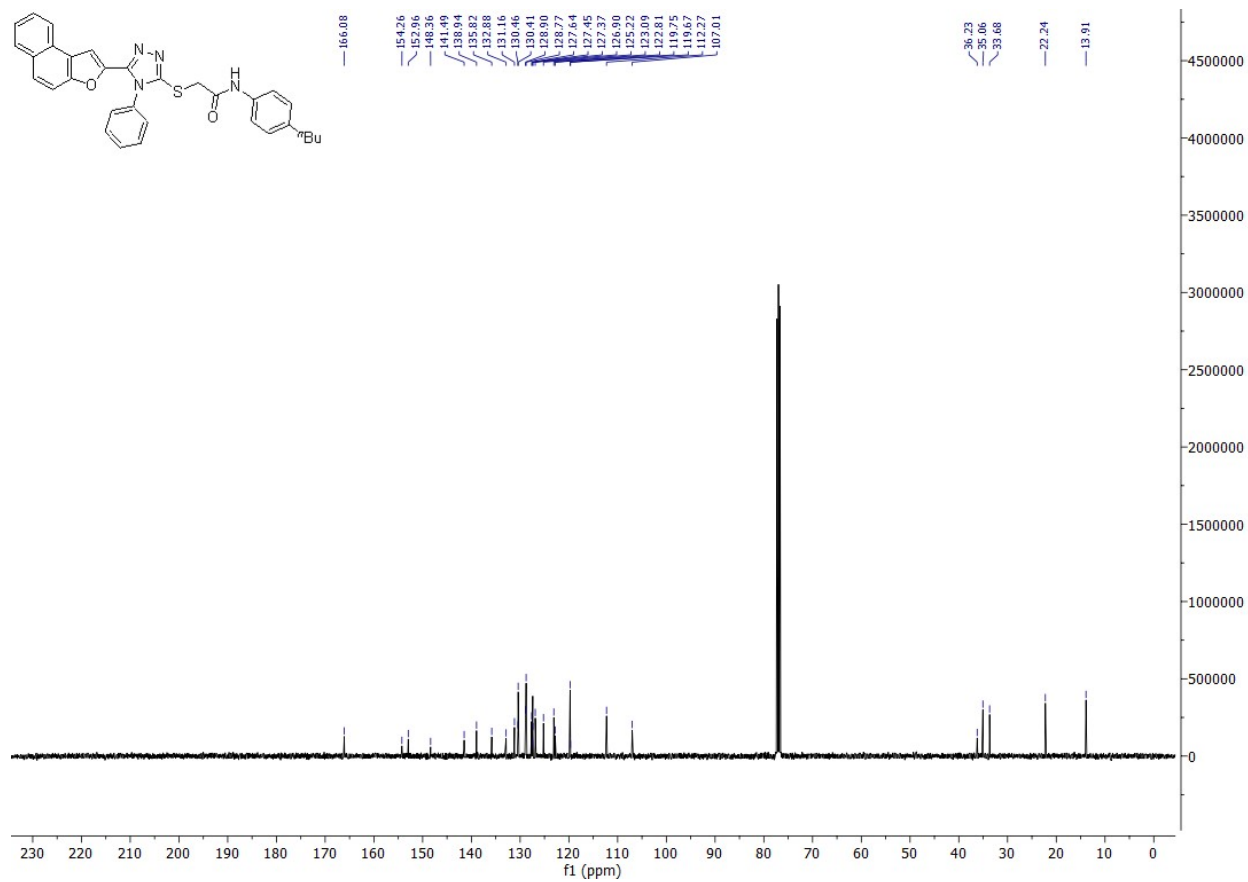

**Figure S 1.2:**  $^{13}\text{C}$ -NMR Spectra of compound 20a

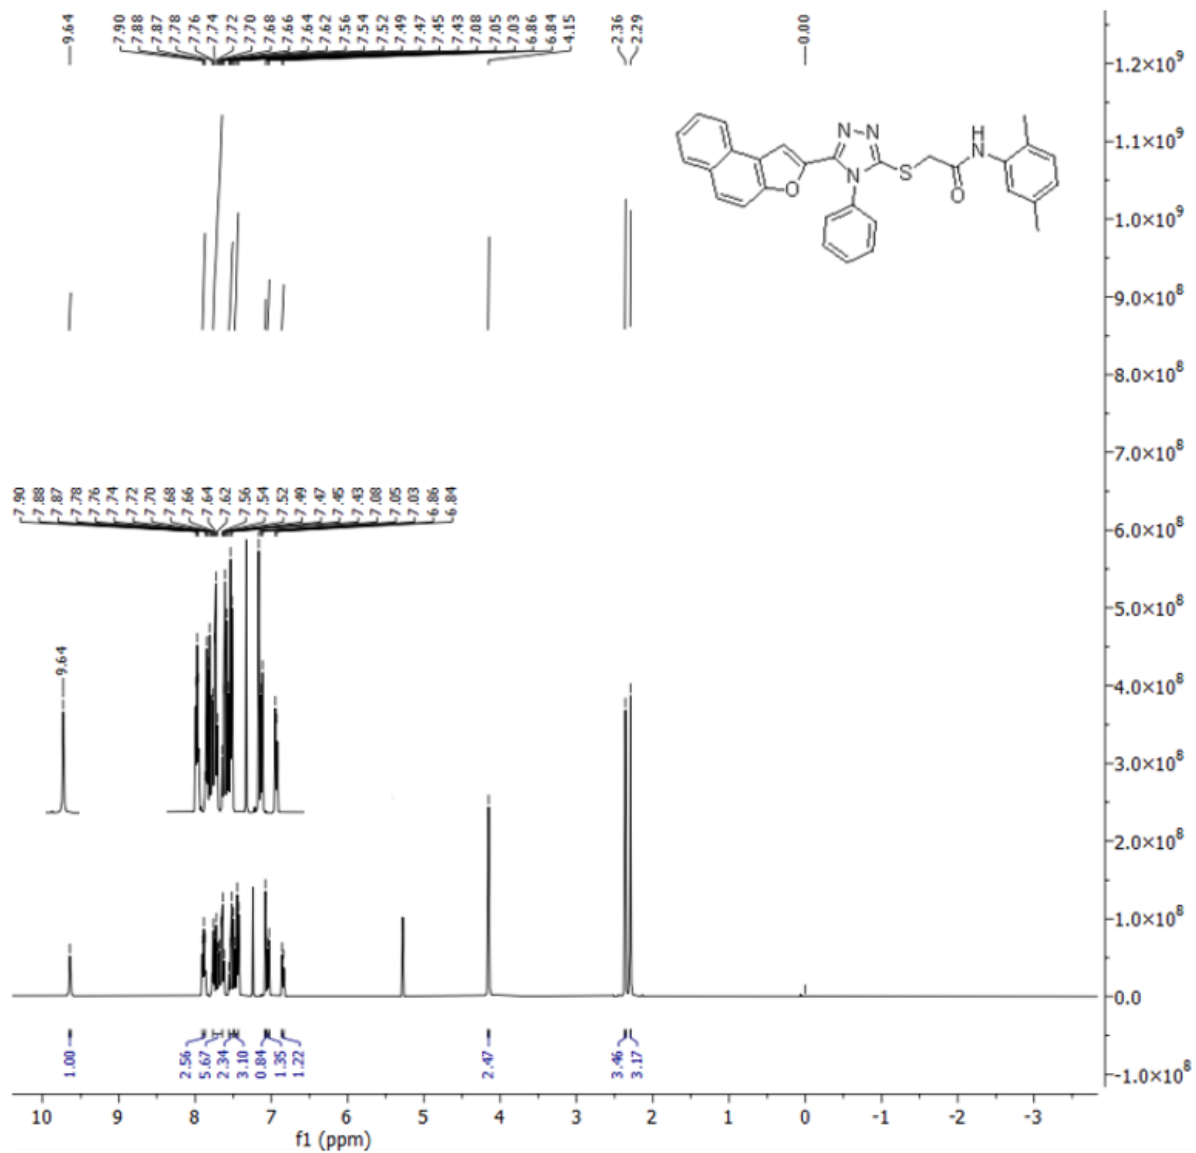

Figure S 1.3:  $^1\text{H-NMR}$  Spectra of compound **20b**

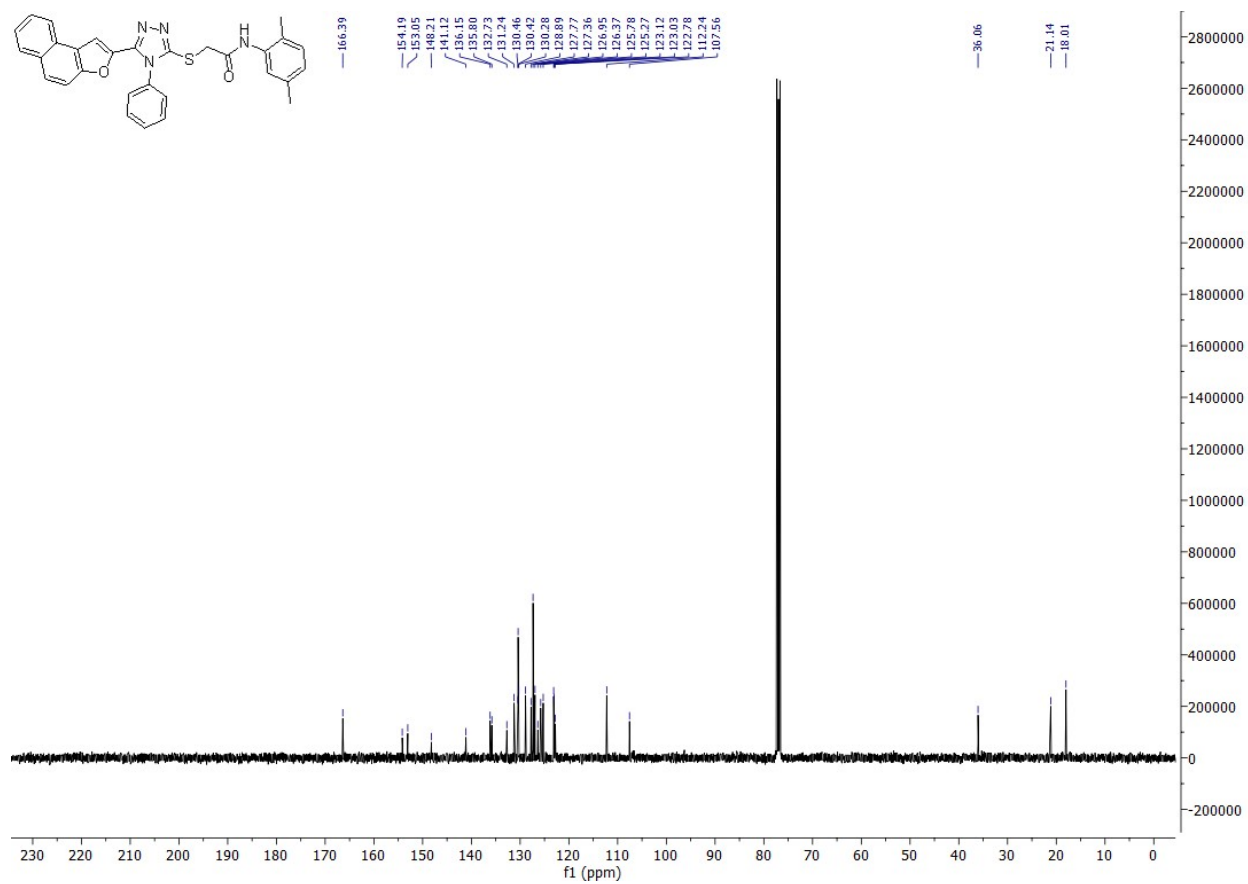

**Figure S 1.4:** <sup>13</sup>C-NMR Spectra of compound 20b

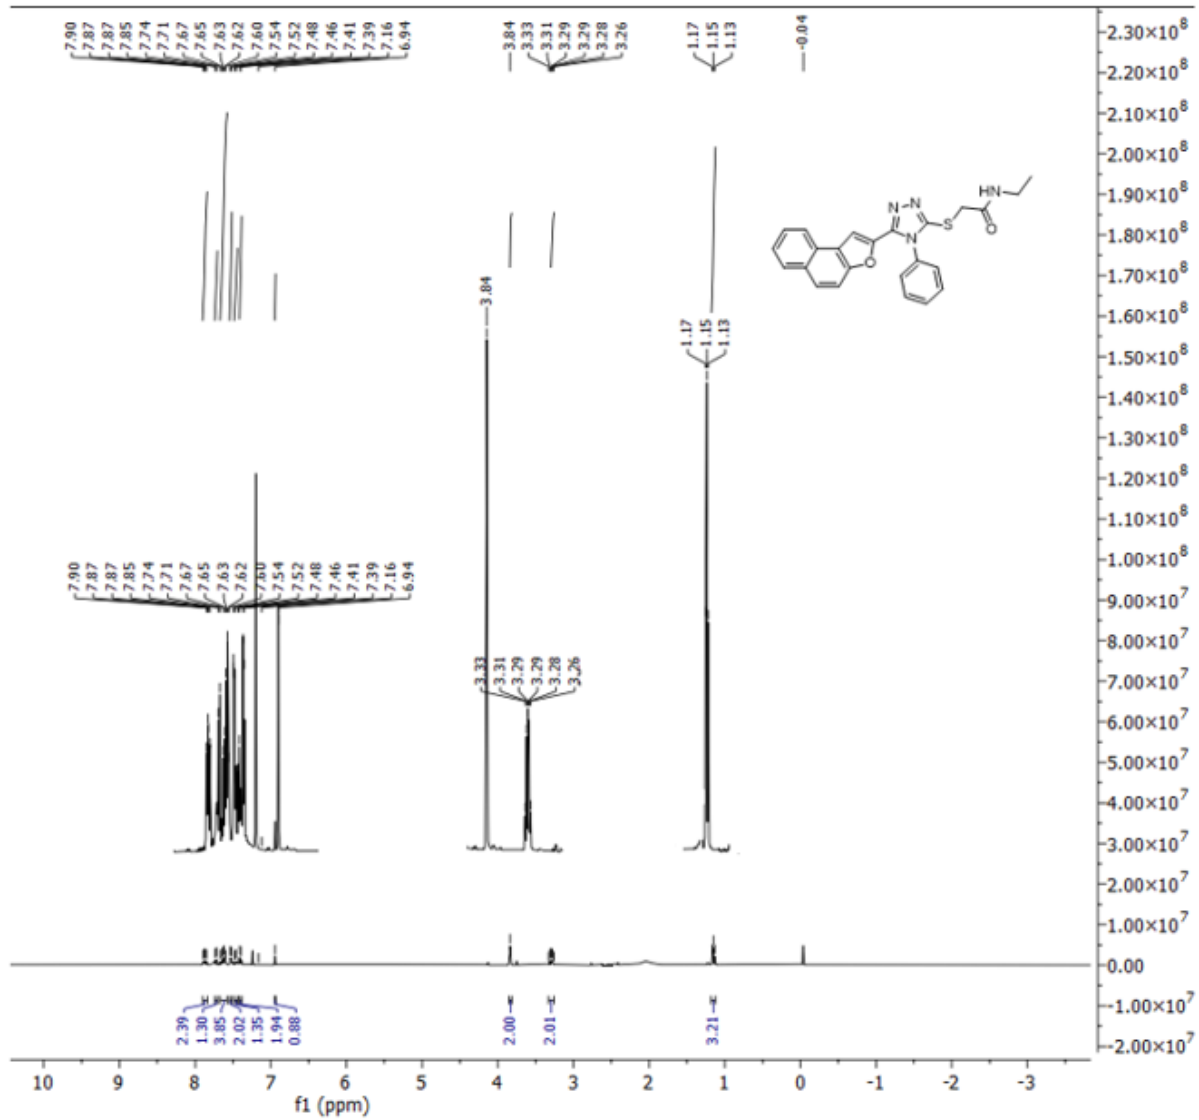

Figure S 1.5: <sup>1</sup>H-NMR Spectra of compound 20c

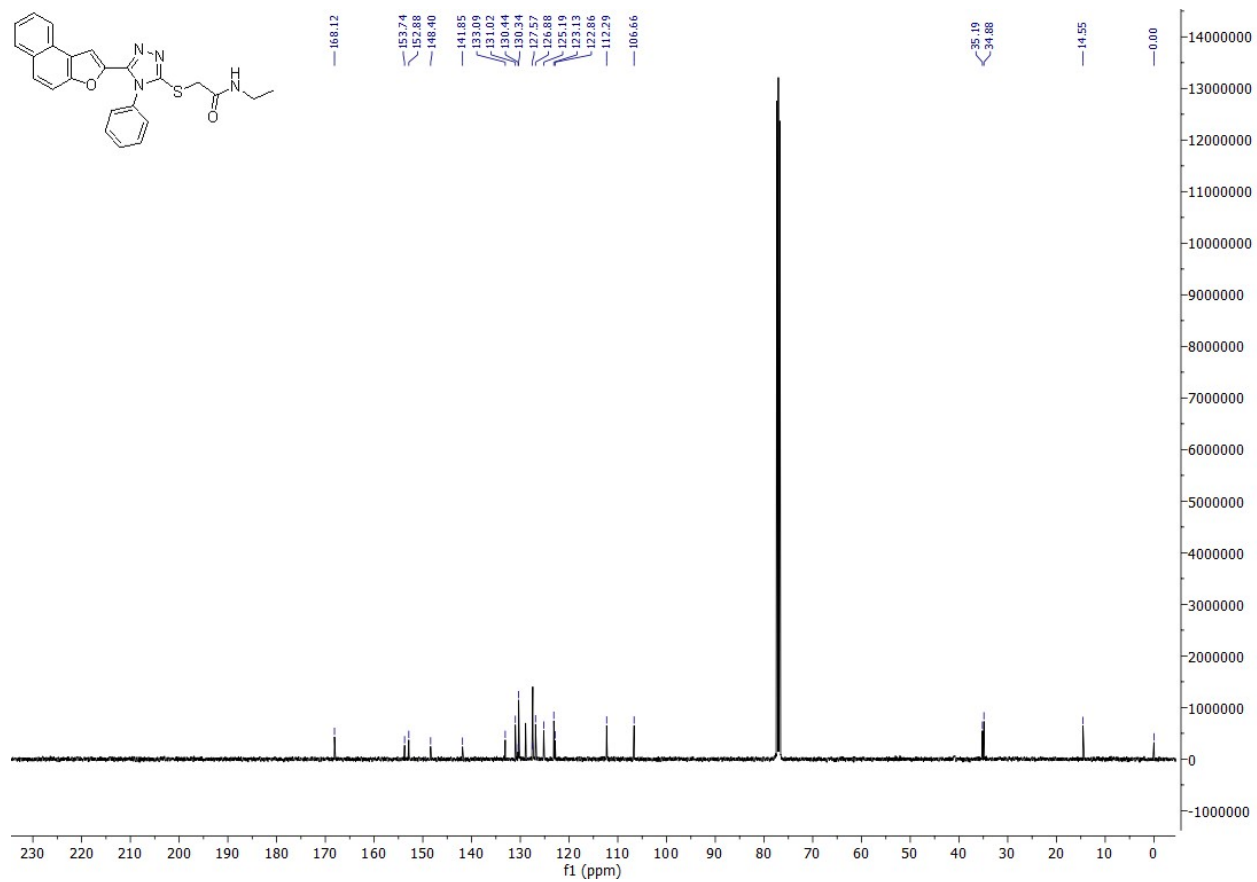

**Figure S 1.6:**  $^{13}\text{C}$ -NMR Spectra of compound 20c

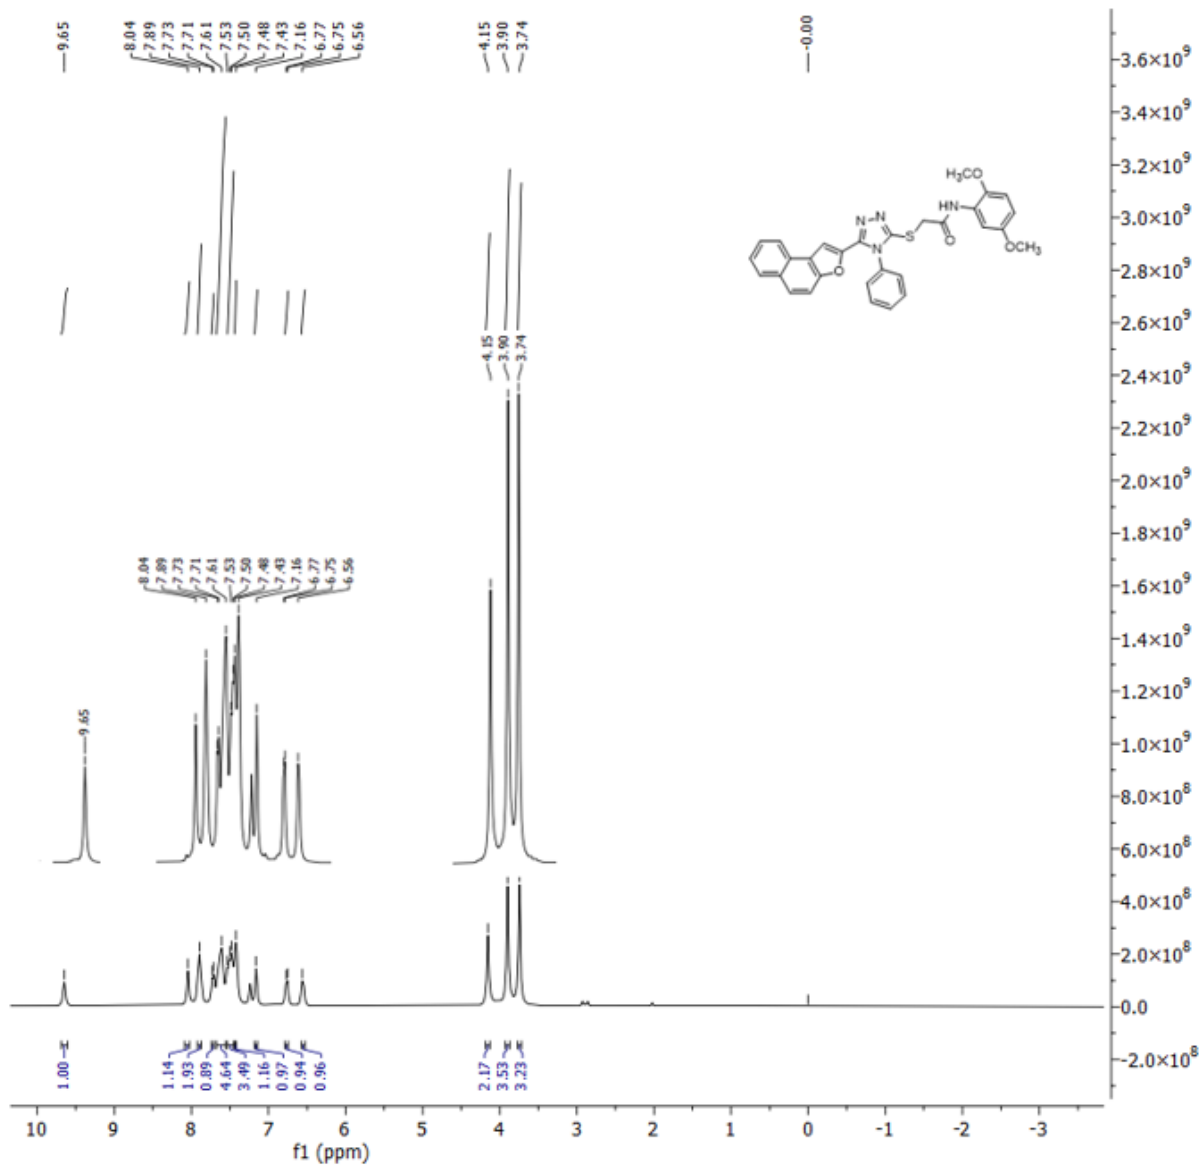

Figure S 1.7:  $^1\text{H}$ -NMR Spectra of compound 20d



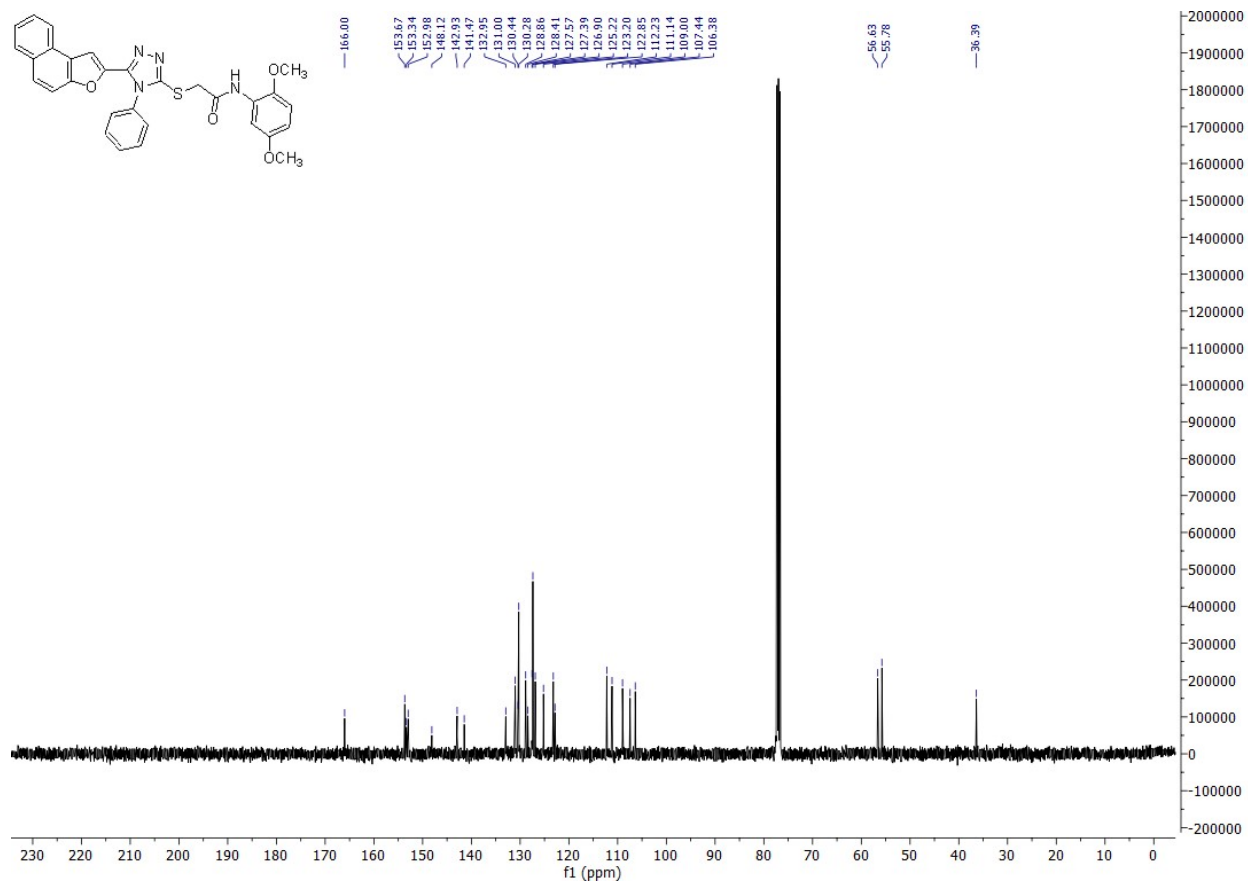

Figure S 1.8 <sup>13</sup>C-NMR Spectra of compound 20d

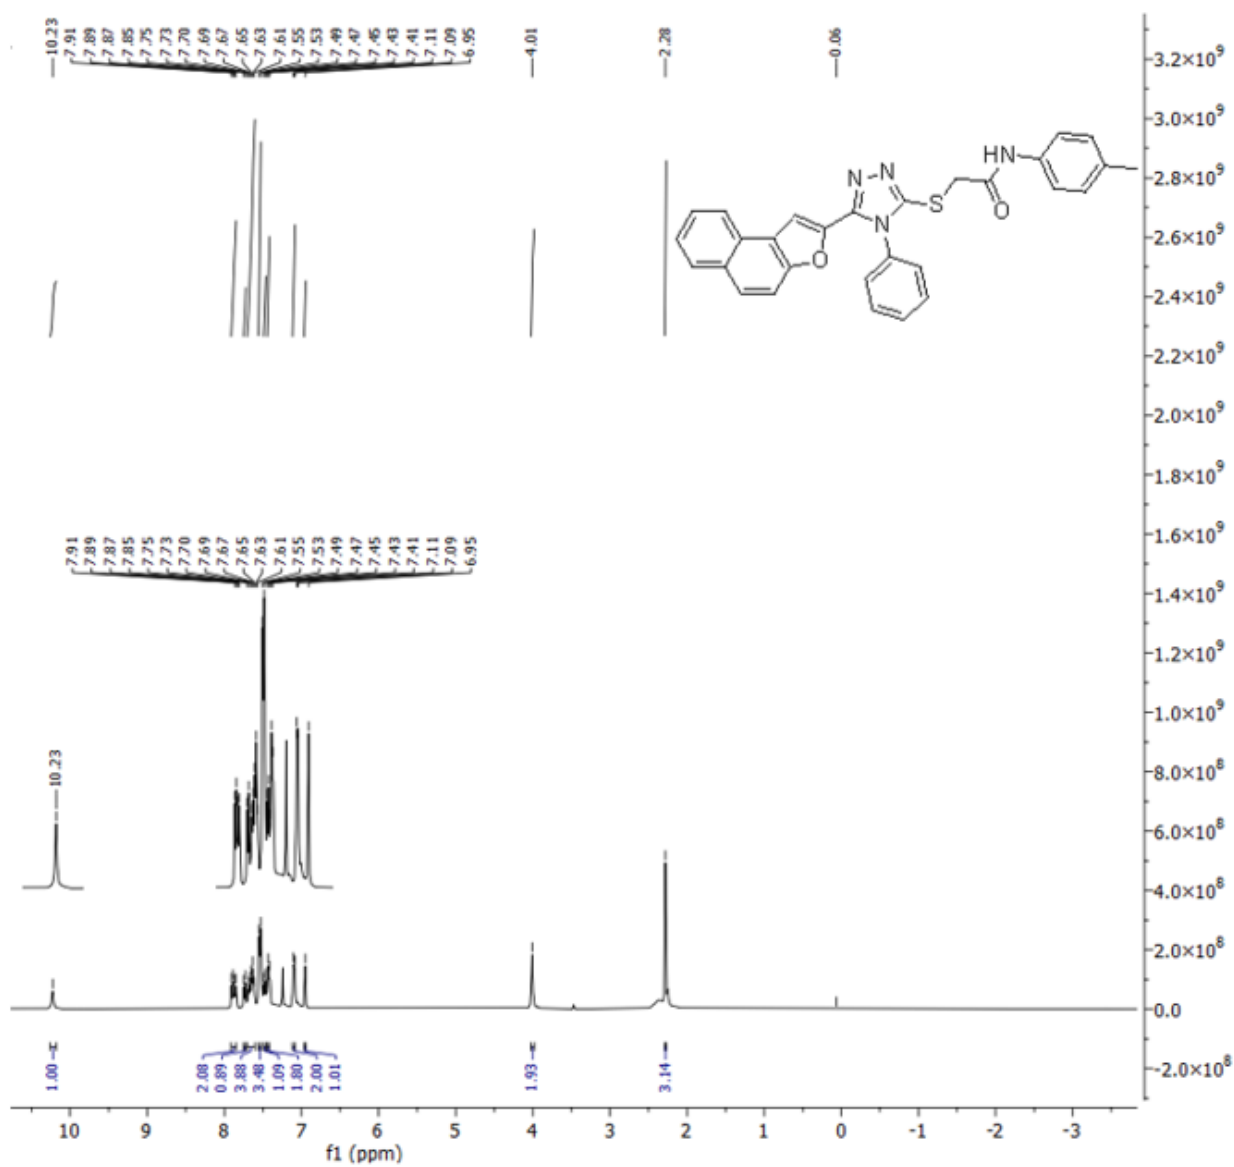

**Figure S 1.9:**  $^1\text{H-NMR}$  Spectra of compound 20e

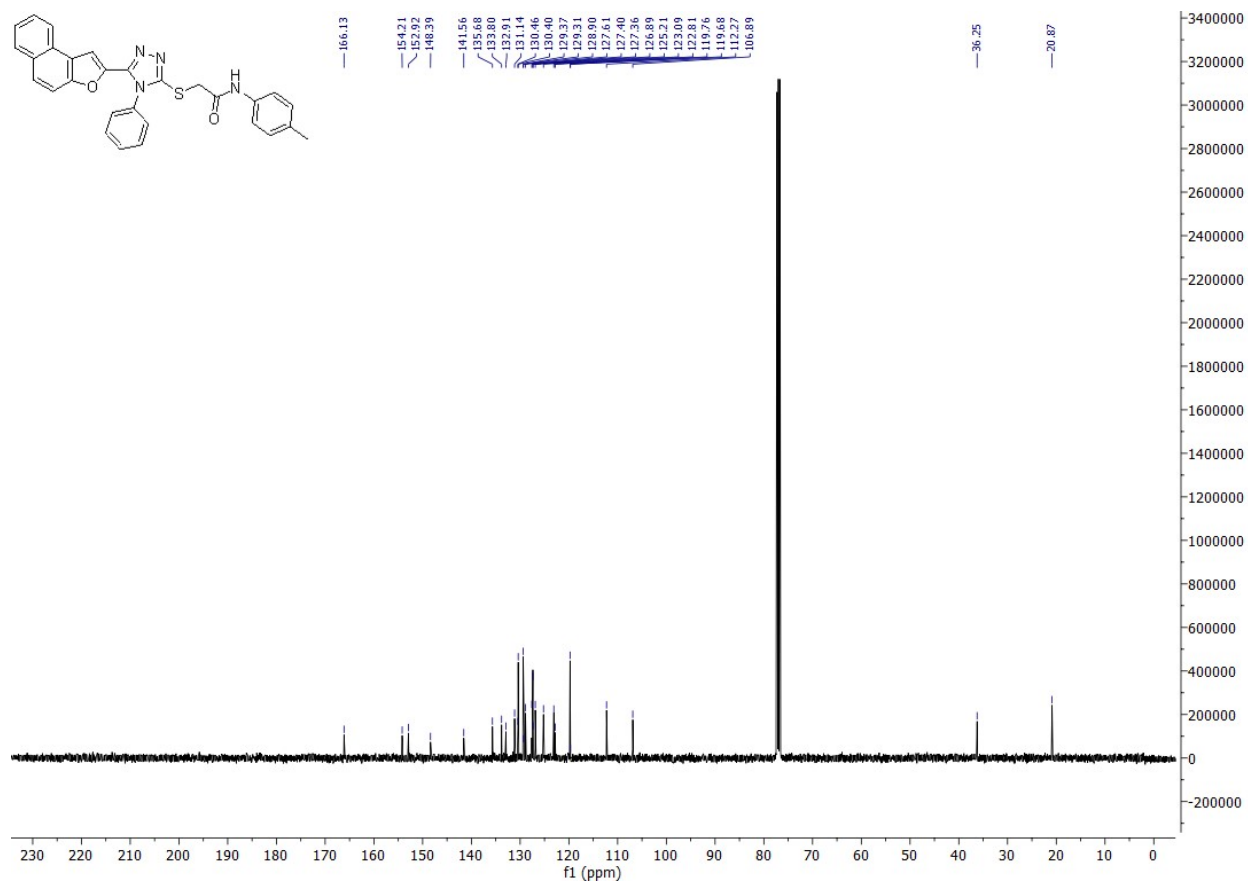

**Figure S 1.10:**  $^{13}\text{C}$ -NMR Spectra of compound 20e

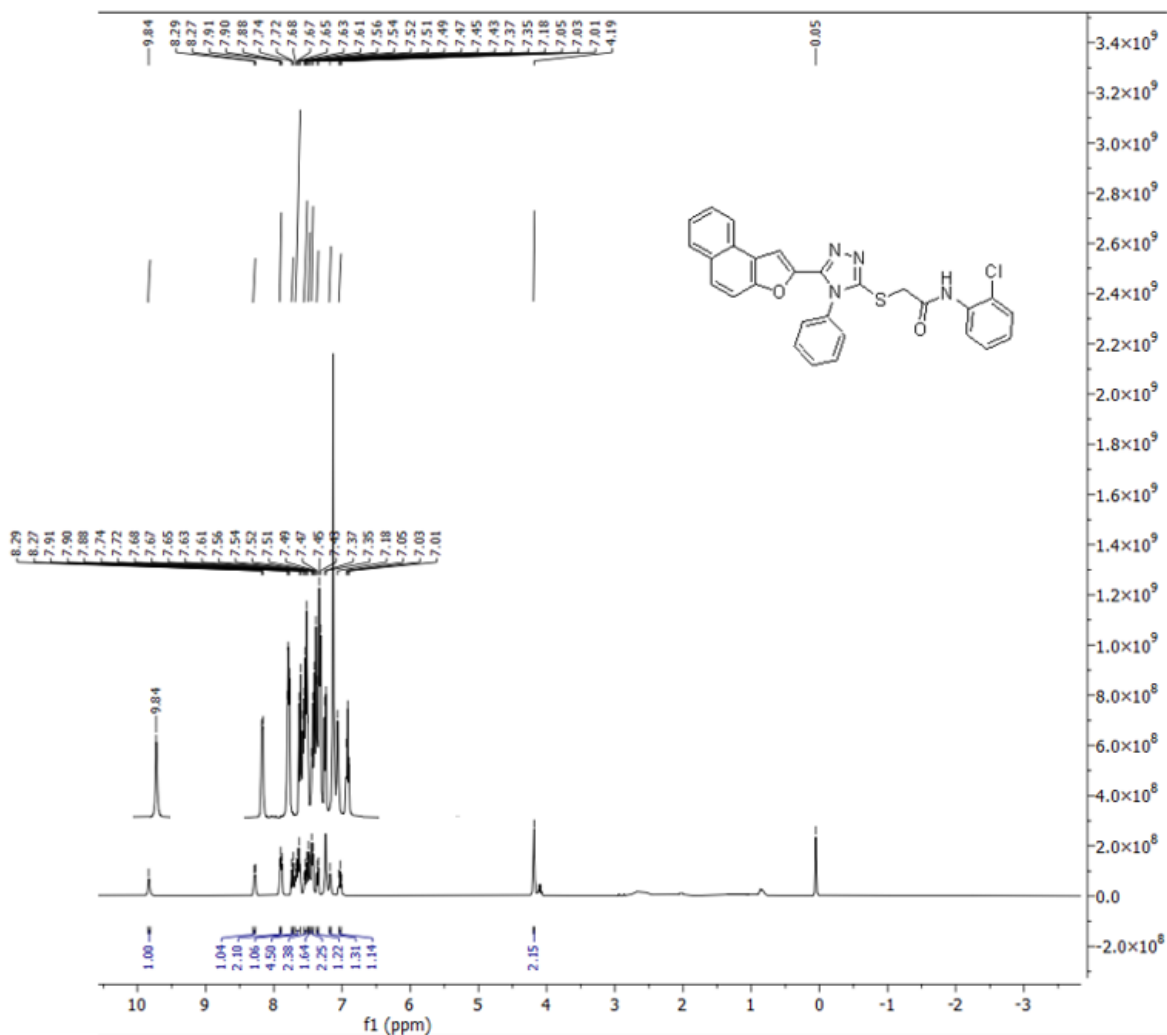

Figure S 1.11:  $^1\text{H-NMR}$  Spectra of compound 20f

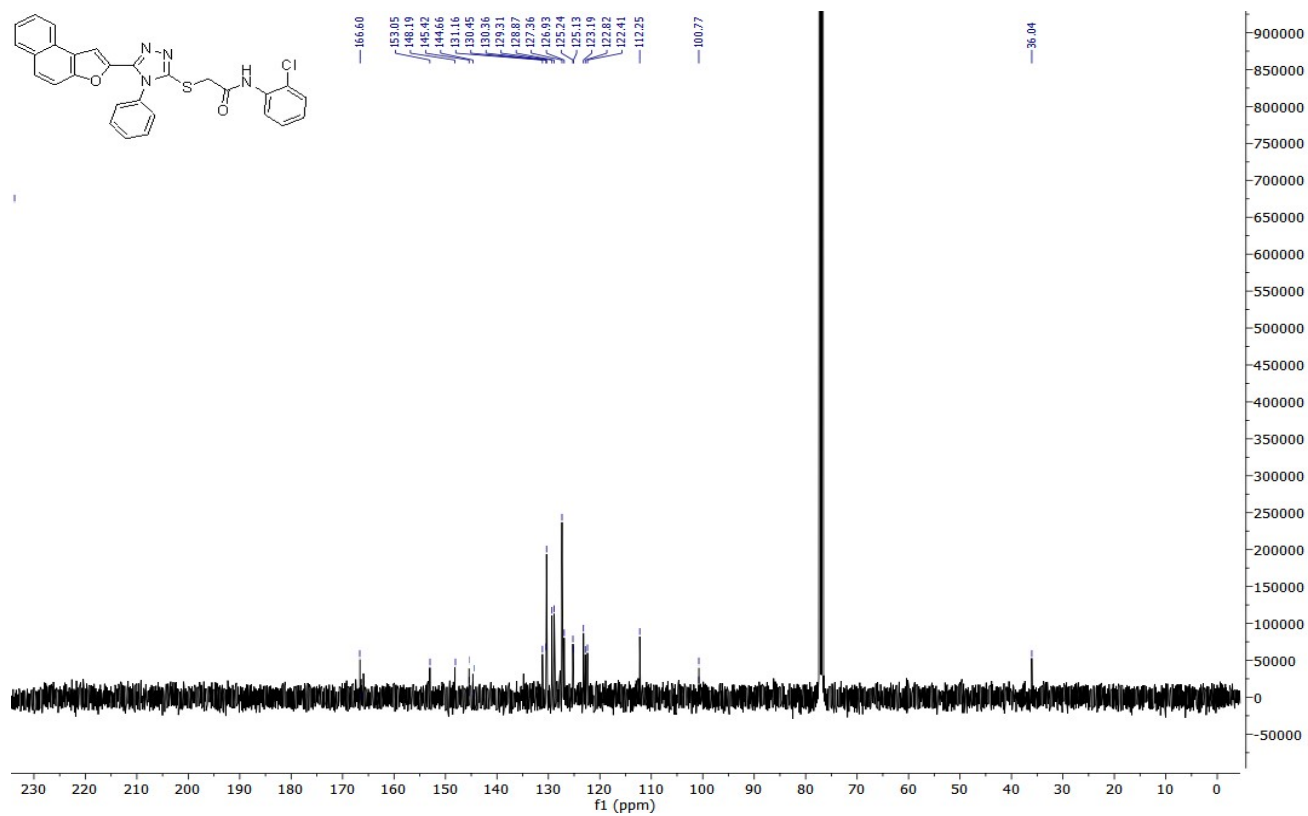

**Figure S 1.12:**  $^{13}\text{C}$ -NMR Spectra of compound **20f**

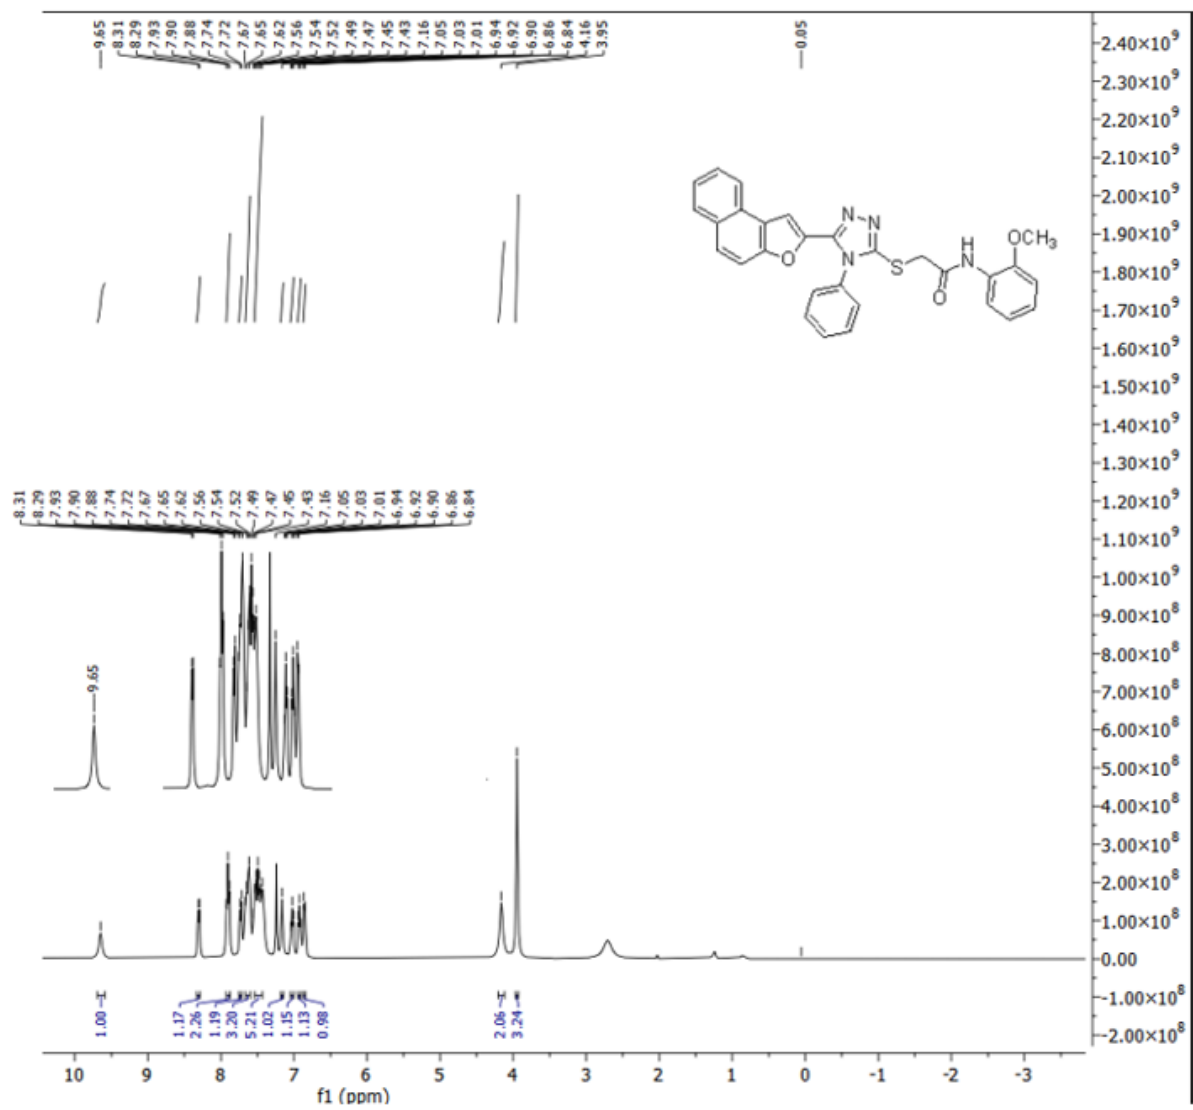

Figure S 1.13: <sup>1</sup>H-NMR Spectra of compound 20g

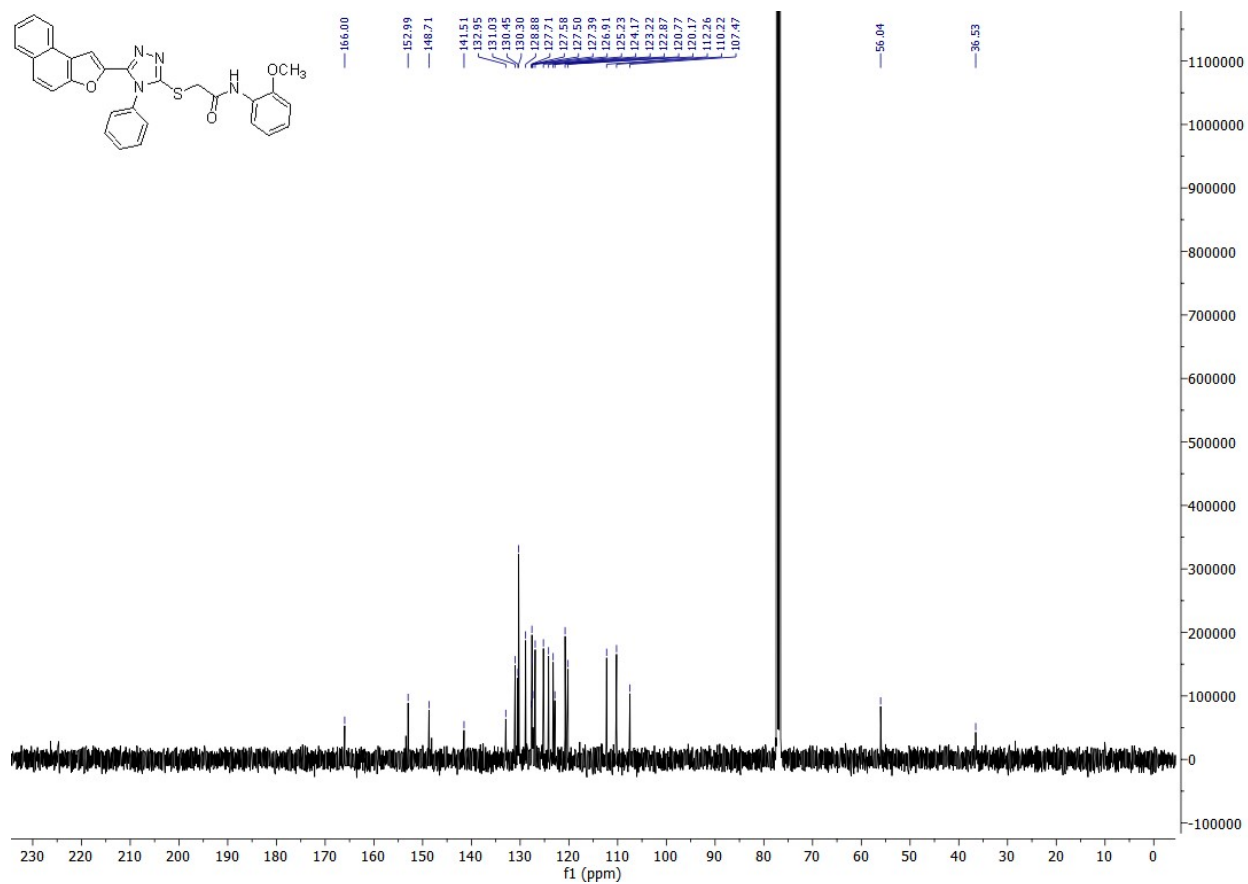

**Figure S 1.14:**  $^{13}\text{C}$ -NMR Spectra of compound 20g

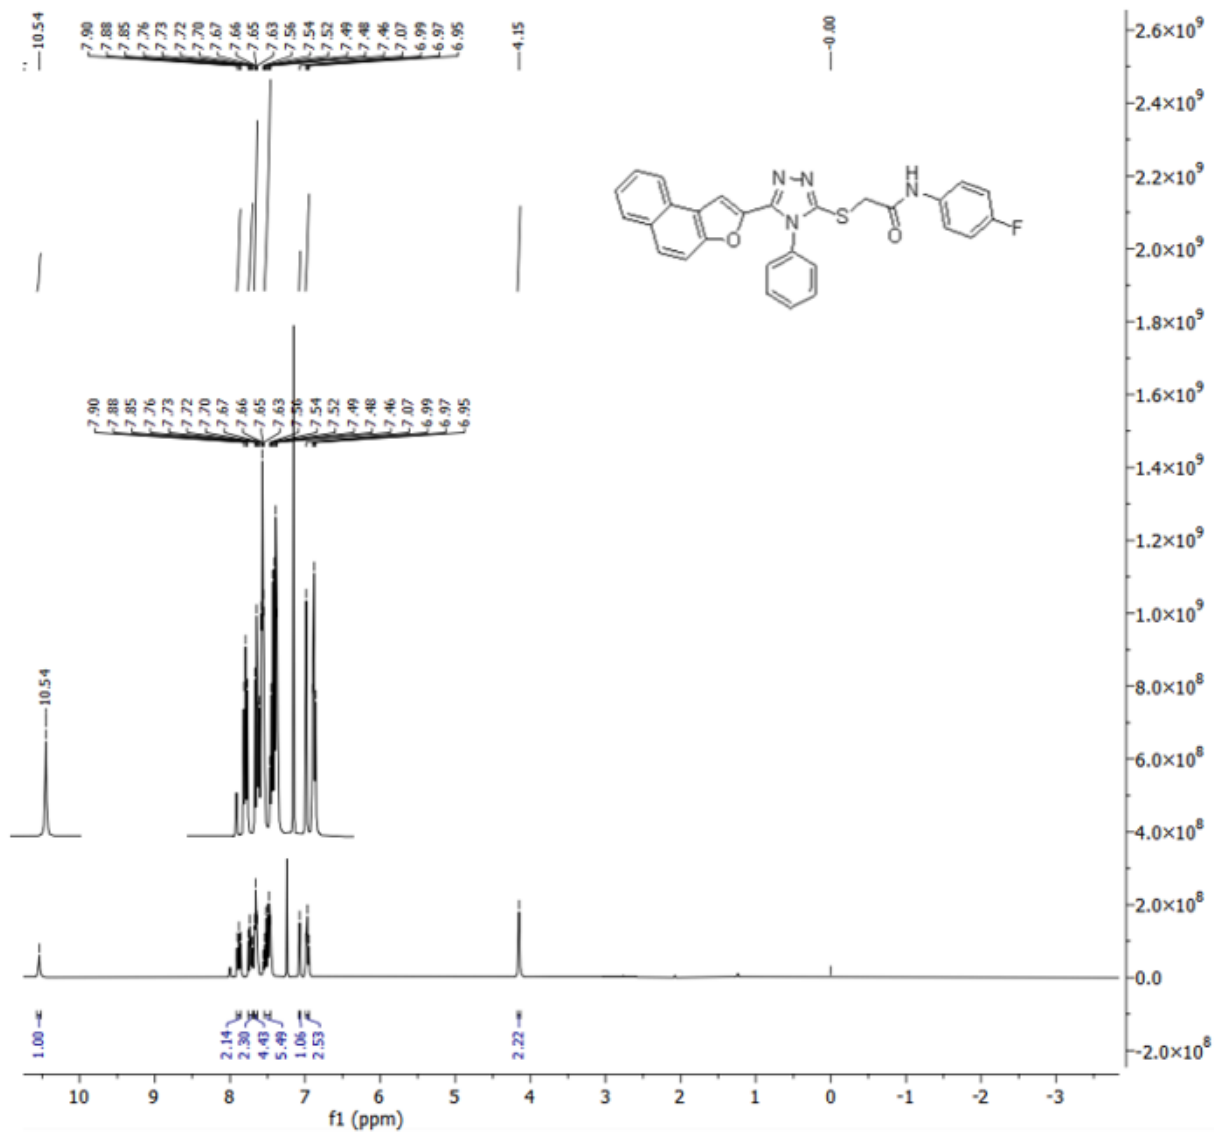

Figure S 1.15: <sup>1</sup>H-NMR Spectra of compound 20h



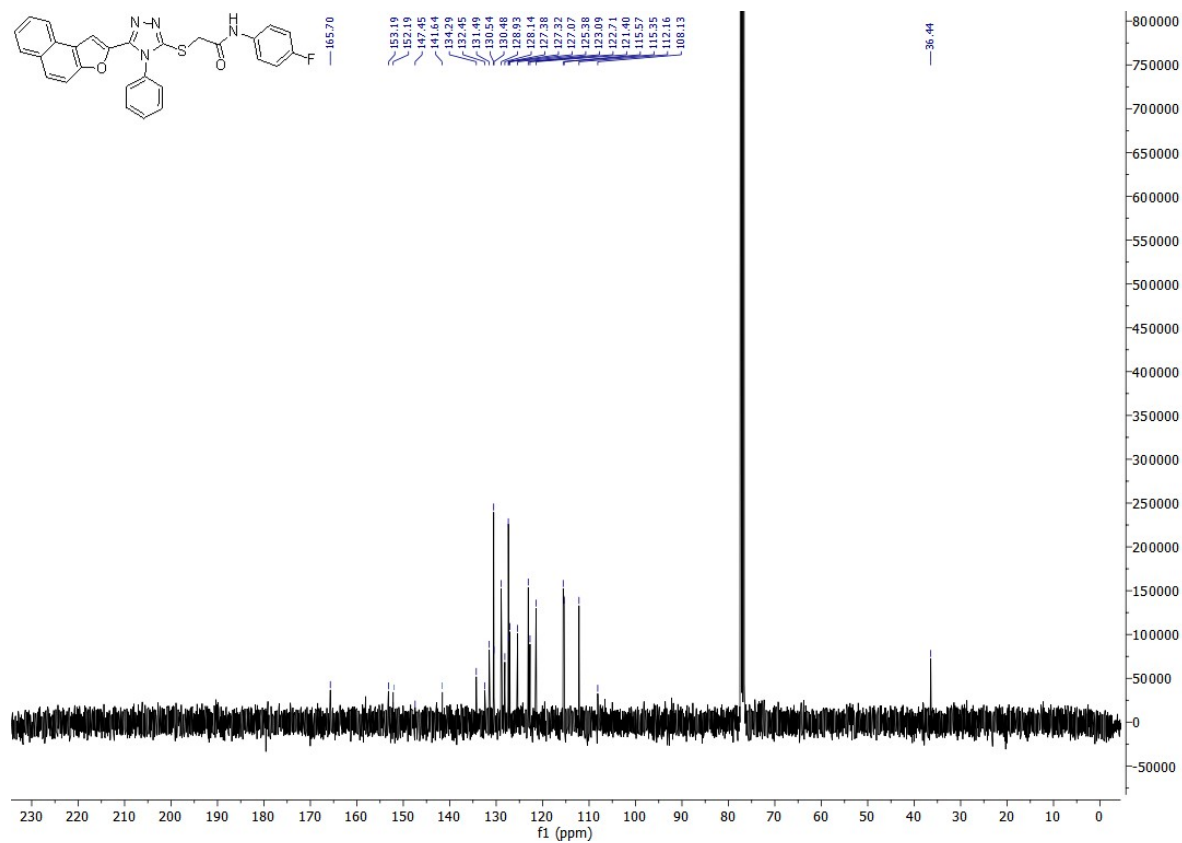

Figure S 1.16:  $^{13}\text{C}$ -NMR Spectra of compound 20h

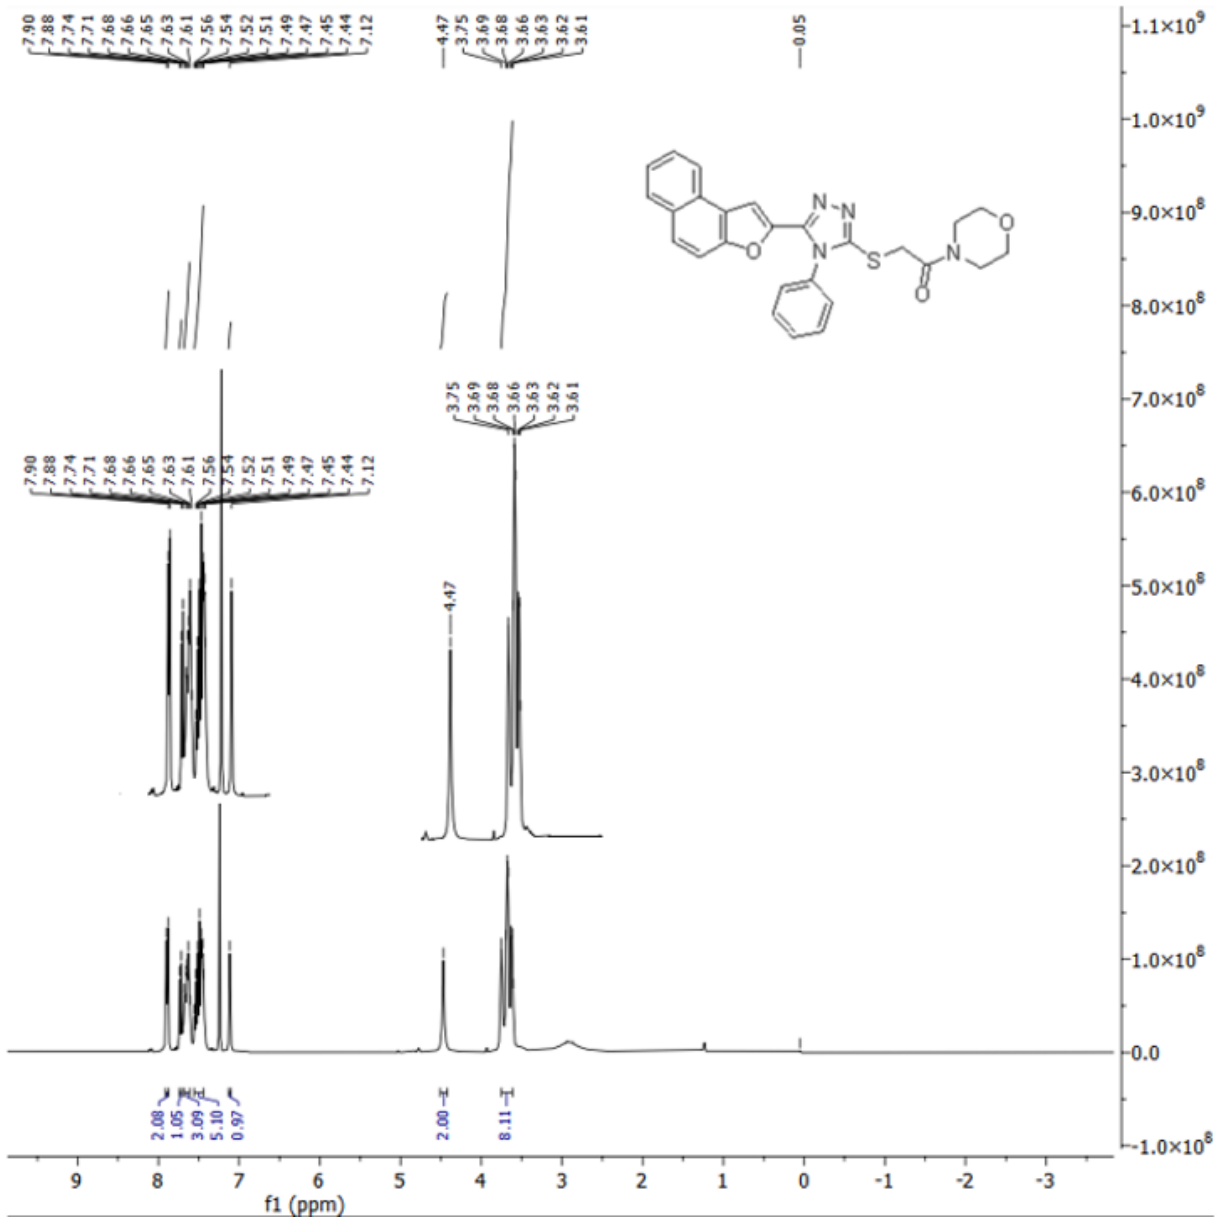

Figure S 1.17: <sup>1</sup>H-NMR Spectra of compound 20i

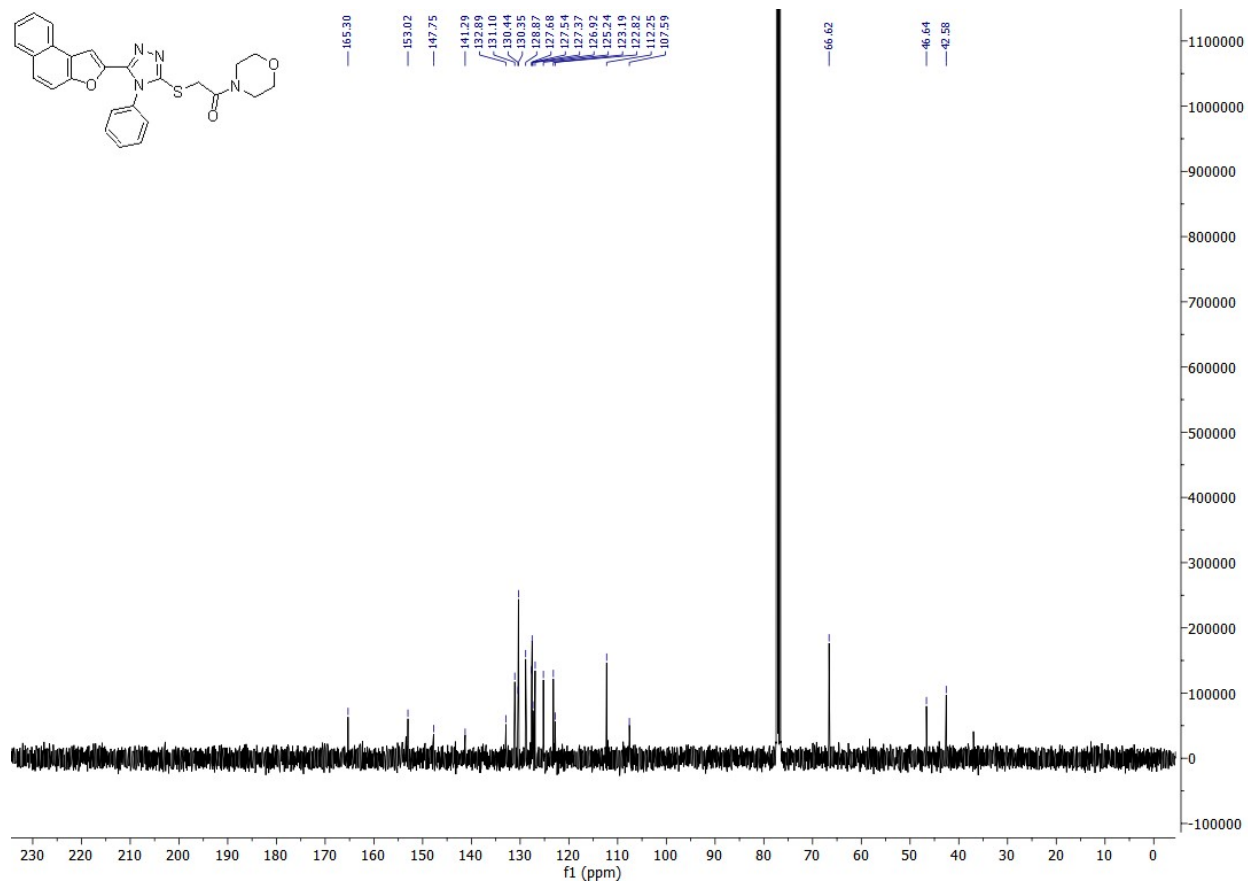

Figure S 1.18: <sup>13</sup>C-NMR Spectra of compound 20i

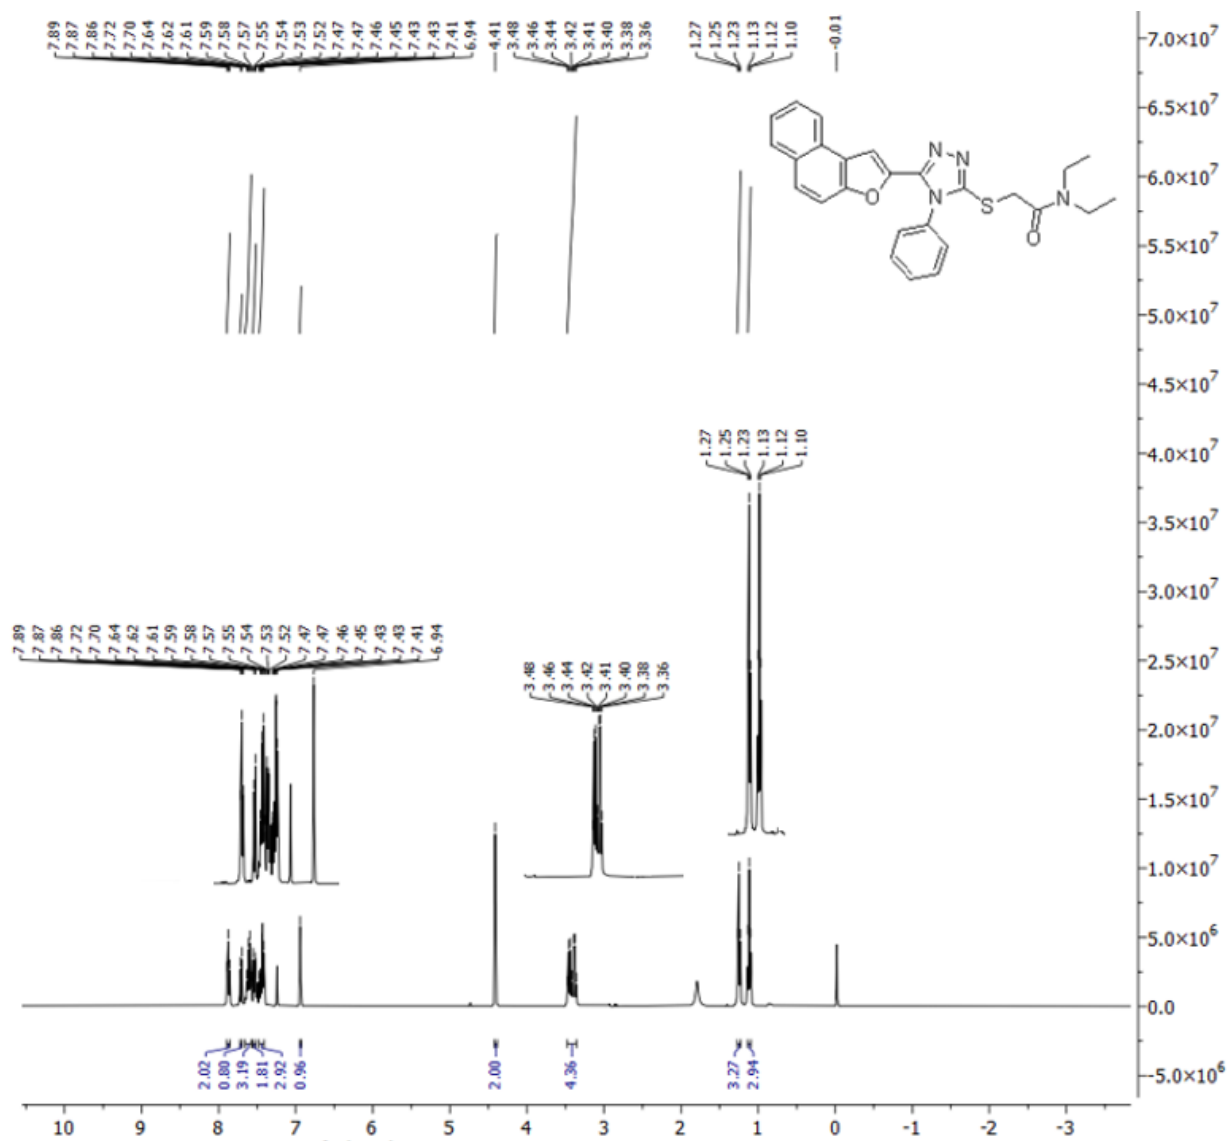

Figure S 1.19:  $^1\text{H-NMR}$  Spectra of compound 20j

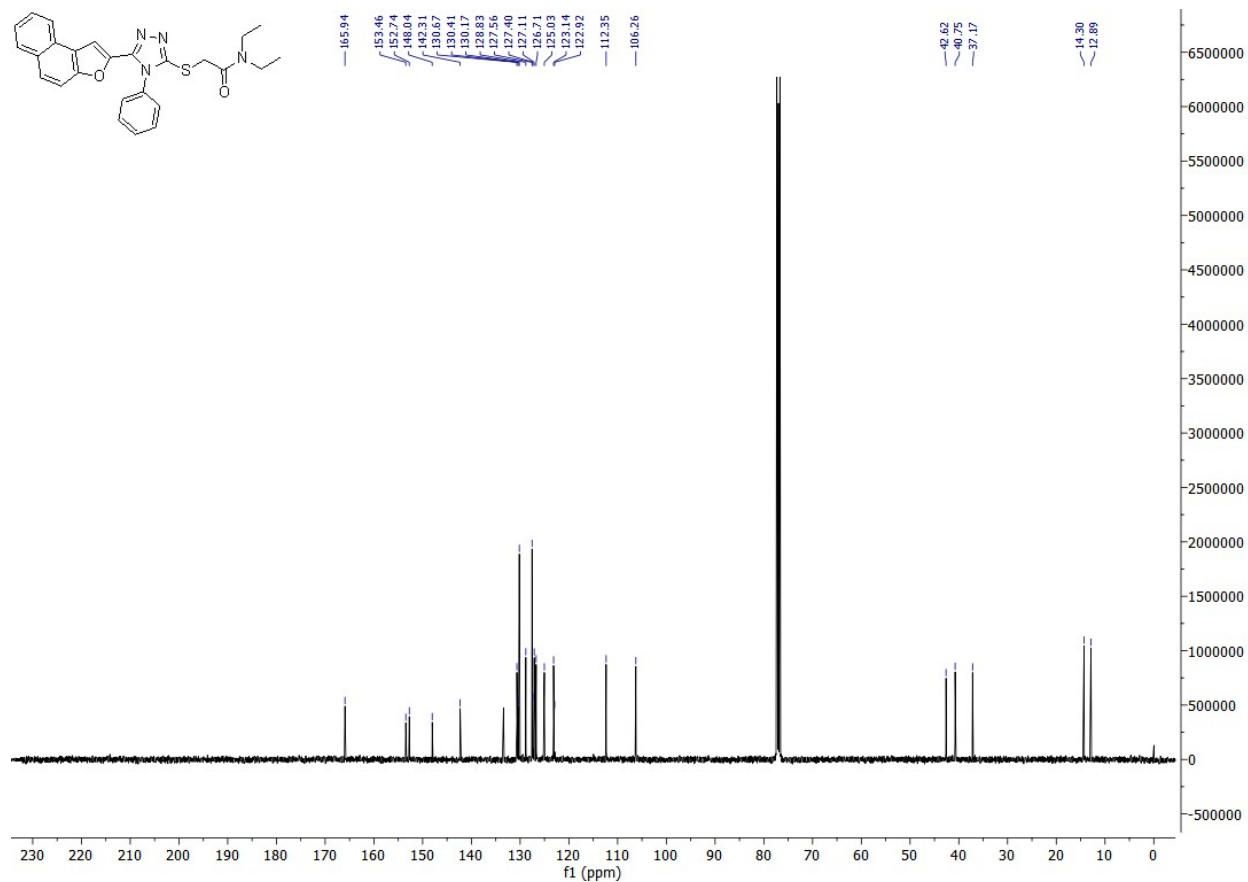

Figure S 1.20:  $^{13}\text{C}$ -NMR Spectra of compound 20j

## 2. MS Spectra

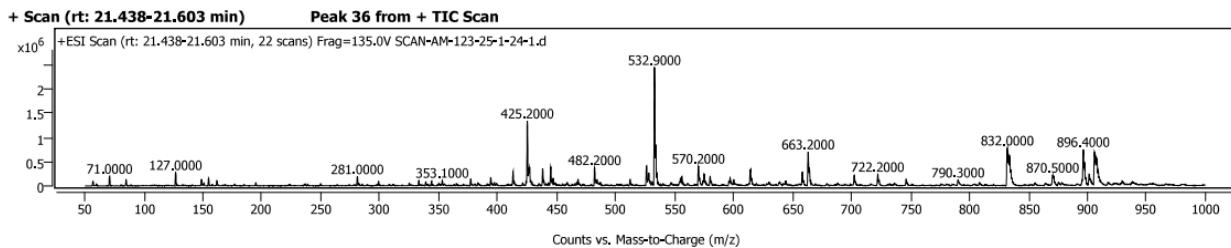

Figure S 1.21: MS spectra of compound 20a

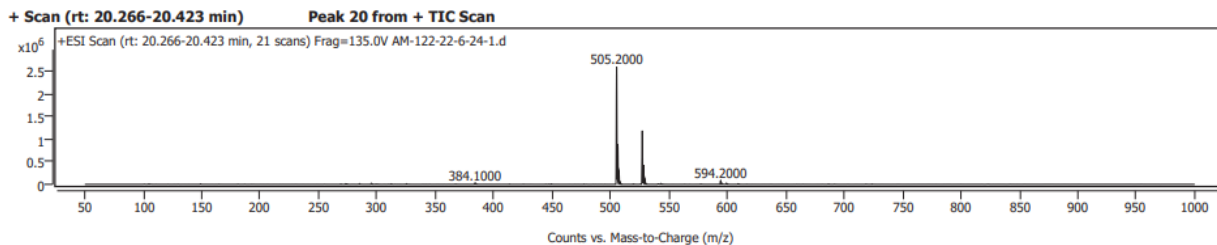

**Figure S 1.22: MS spectra of compound 20b**

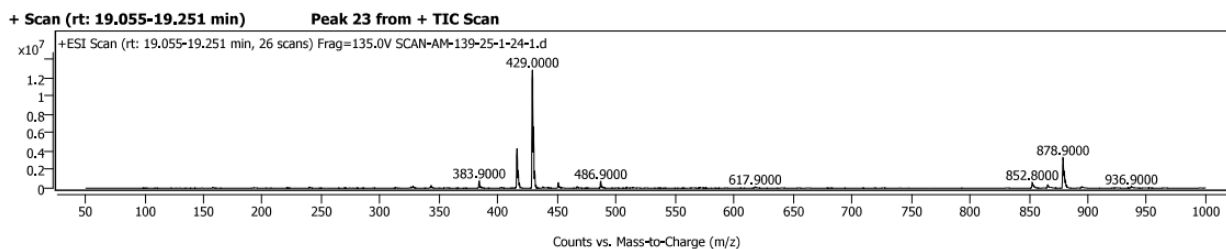

**Figure S 1.23: MS spectra of compound 20c**

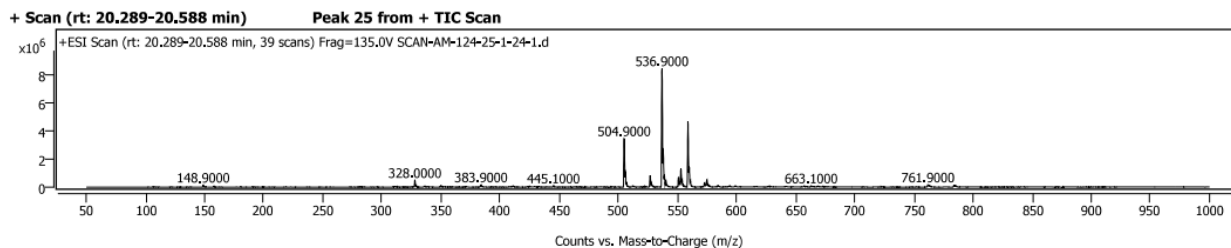

**Figure S 1.24: MS spectra of compound 20d**

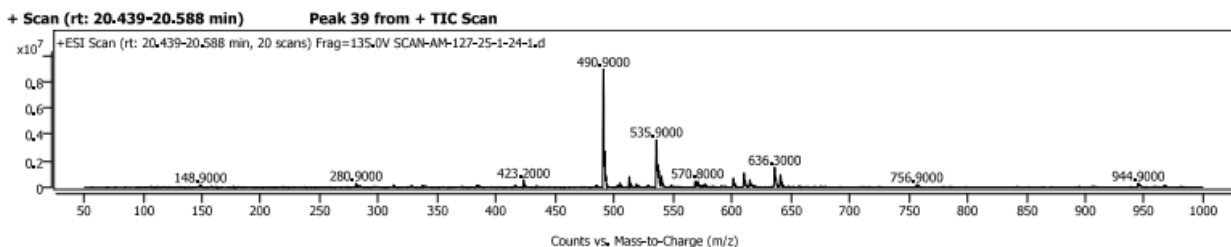

**Figure S 1.25: MS spectra of compound 20e**

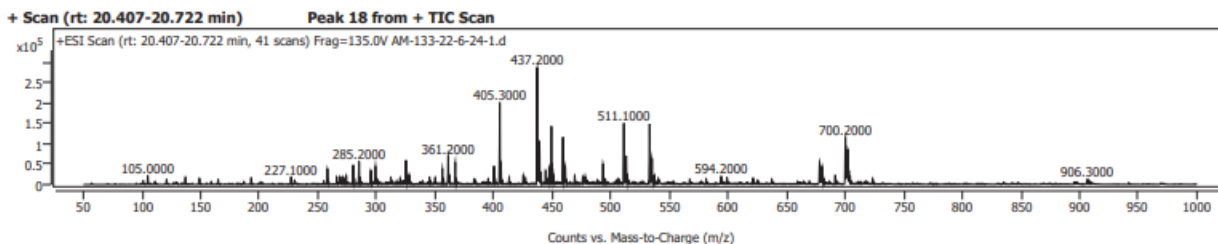

**Figure S 1.26: MS spectra of compound 20f**

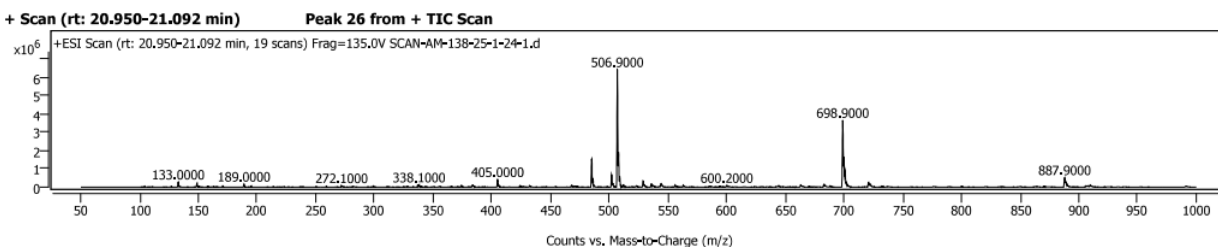

**Figure S 1.27: MS spectra of compound 20g**

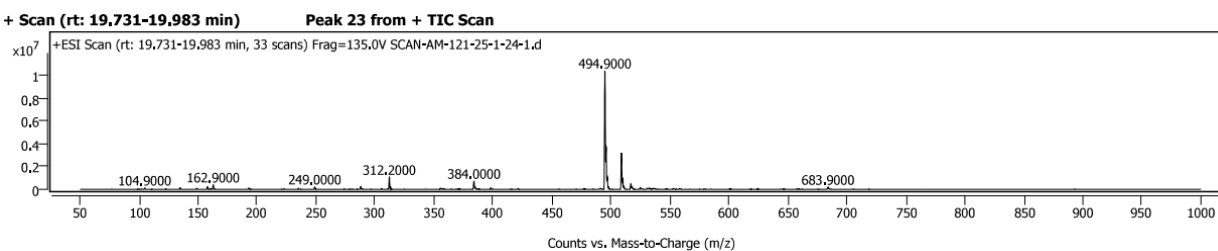

**Figure S 1.28: MS spectra of compound 20h**

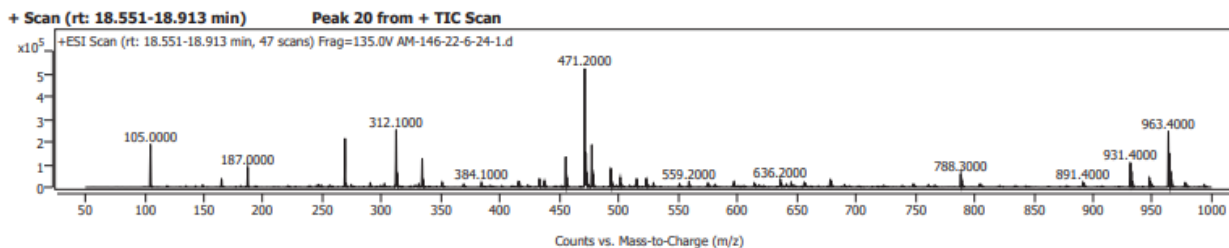

**Figure S 1.29: MS spectra of compound 20i**

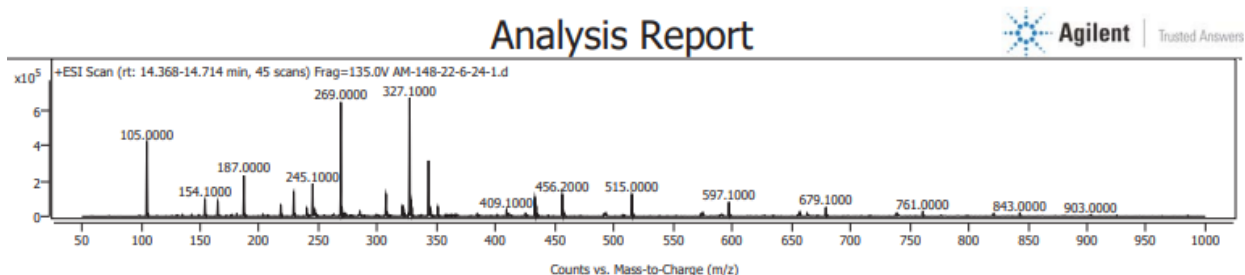

**Figure S 1.30:** MS spectra of compound **20j**
